# Supplementary material for: Modulation of the properties of dinuclear lanthanide complexes through utilizing different β-diketonate co-ligands: near-infrared luminescence and magnetization dynamics
Source: Royal Society of Chemistry journal article supplement (doi:10.1039/c9dt04093e), 2020-01-01
Supplement: c9dt04093e1.pdf [file c9dt04093e1.pdf]

## Electronic Supplementary Information

# Modulation of properties with dinuclear lanthanide complexes through utilizing different $\beta$ -diketone co-ligands: near-infrared luminescence and magnetization dynamics

Yun-Juan Wang,<sup>a</sup> Dong-Fang Wu,<sup>a</sup> Jian Gou,<sup>a</sup> Yao-Yao Duan,<sup>a</sup> Ling Li,<sup>a</sup> Huan-Huan Chen,<sup>a</sup>  
Hong-Ling Gao<sup>\*a,b</sup> and Jian-Zhong Cui<sup>\*a,b</sup>

### List of contents

**Section S1** Supplementary Experimental Section

**Section S2** Powder X-ray Diffraction, UV-Vis spectra, Photoluminescence properties  
and Near-infrared luminescence spectra

**Section S3** Plots of Magnetic Data

**Section S4** Crystallographic Data and Continuous Shape Measures Values

---

<sup>a</sup>Department of Chemistry, Tianjin University, Tianjin, 300354, China.

\* Corresponding authors, E-mail: cuijianzhong@tju.edu.cn, ghl@tju.edu.cn.

<sup>b</sup>Key Laboratory of Advanced Energy Materials Chemistry (Ministry of Education), Nankai University, Tianjin, 300071, China.

**Scheme S1** The synthesis of N'-(2-hydroxy-5-methylphenyl)-pyrazine-2-carbohydrazide (H<sub>2</sub>L).

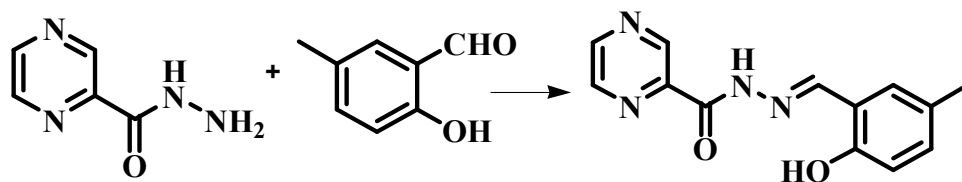

To a solution of 2-hydroxy-5-methylbenzaldehyde (10 mmol) in ethanol was added a solution of pyrazine-2-carbohydrazide (10 mmol) <sup>1</sup> in ethanol (Scheme S1). The reaction mixture is stirred overnight at room temperature, a crude product was obtained, which was washed with ethanol and dried in vacuo to give the H<sub>2</sub>L ligand as a light apricot solid. The pale apricot precipitate was heated to reflux in methanol and recrystallized to give a light yellow needle-like crystalline solid. Yield: *ca.* 80%. Elemental analysis (%), calcd for C<sub>13</sub>H<sub>12</sub>N<sub>4</sub>O<sub>3</sub> (fw = 256.27): C, 60.87; H, 4.68; N, 21.85. Found: C, 61.27; H, 4.98; N, 21.44. <sup>1</sup>H NMR (*d*<sub>6</sub>-DMSO,  $\delta$ /ppm): 2.26(3H, C-H), 3.17(1H, C-H), 6.84, 7.13, 7.33(3H, C-H), 8.80, 8.97, 9.30(3H, C-H), 11.07(1H, N-H), 12.68 (1H, O-H) (<sup>1</sup>H NMR spectrum of H<sub>2</sub>L is shown in Fig. S1, ESI<sup>†</sup>)

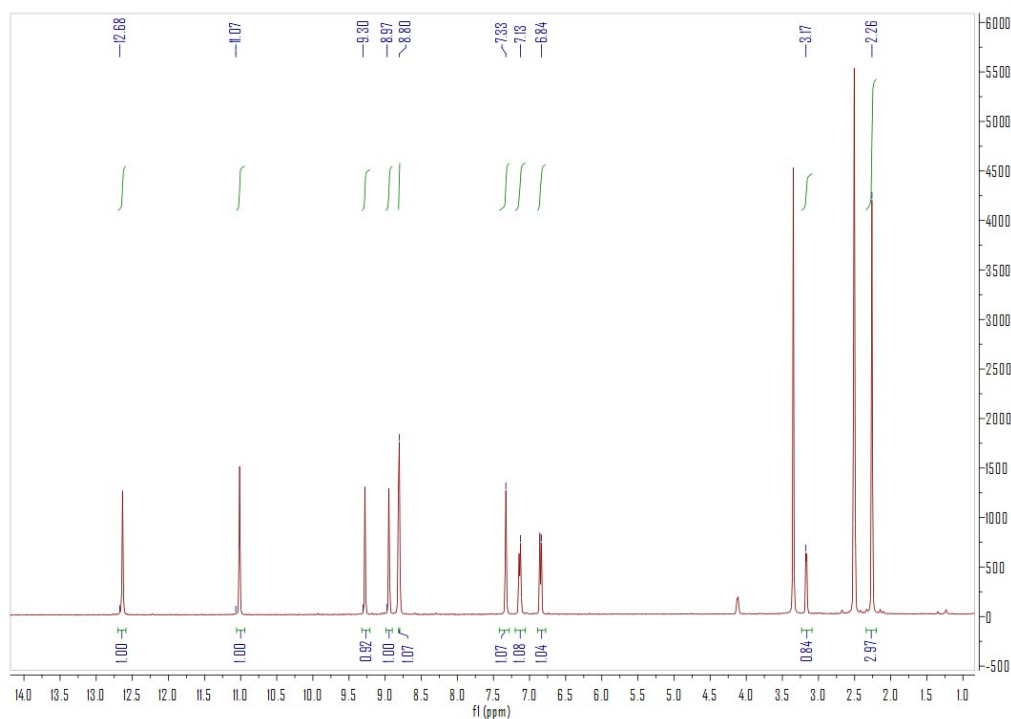

**Fig. S1** <sup>1</sup>H NMR spectrum (400 MHz, *d*<sub>6</sub>-DMSO) of H<sub>2</sub>L.

### **Scheme S2 Powder X-ray diffraction (PXRD)**

The phase purity of crystalline samples of **1–10** were characterized by powder X-ray diffraction (PXRD) at room temperature (Fig. S2, ESI<sup>†</sup>). The experimental peaks conform with those simulated from the single crystal X-ray diffraction data.

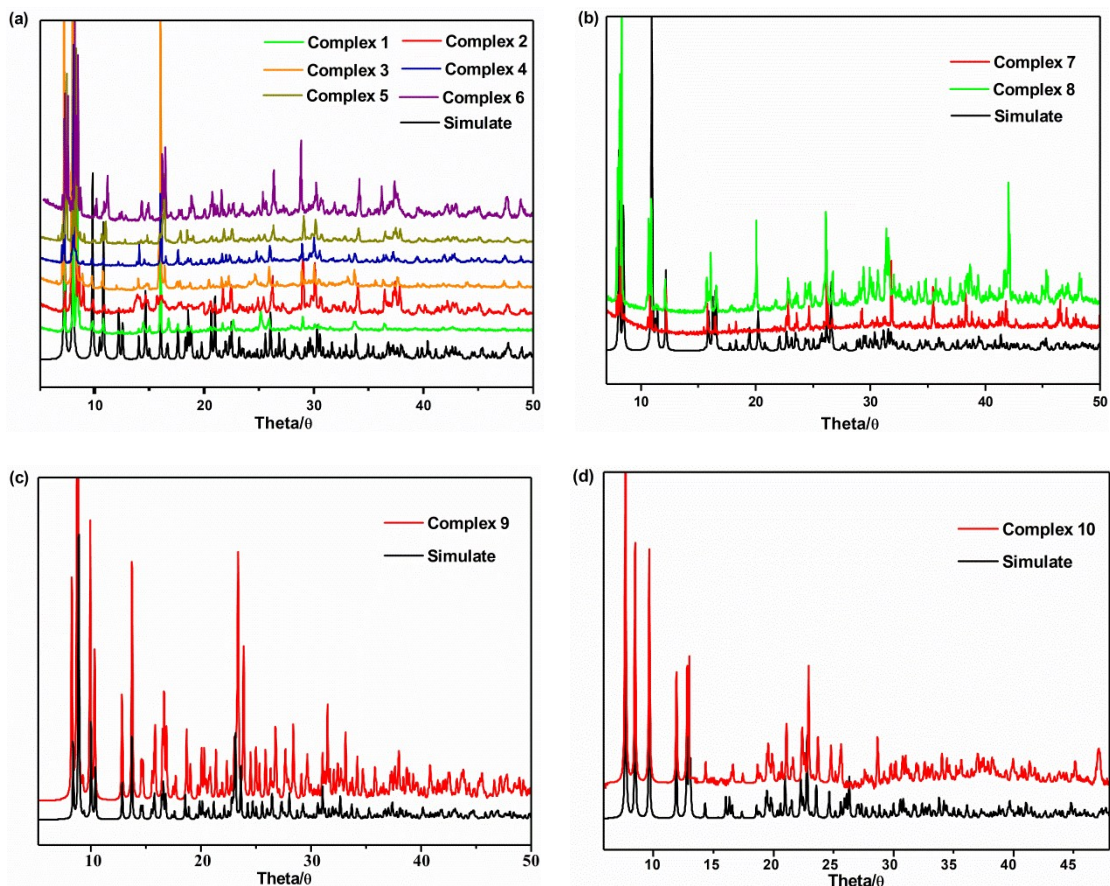

Fig. S2 PXRD patterns of complexes 1-6(a), 7-8(b), 9(c) and 10(d).

### UV-Vis spectra

The UV-Vis absorption spectra of  $\text{Dy}(\text{dbm})_3 \cdot 2\text{H}_2\text{O}$ ,  $\text{Dy}(\text{acac})_3 \cdot 2\text{H}_2\text{O}$ ,  $\text{Dy}(\text{TTA})_3 \cdot 2\text{H}_2\text{O}$ ,  $\text{Dy}(\text{tfa})_3 \cdot 2\text{H}_2\text{O}$ , the ligand  $\text{H}_2\text{L}$  and complexes **1–10** in dichloromethane solutions were measured in the range of 200–600 nm at room temperature (Fig. S3, ESI†). For the ligand  $\text{H}_2\text{L}$ , three main absorption bands were observed at *ca.* 238, 293, and 351 nm, respectively. As fig. S3 (a) shows, for  $\text{Dy}(\text{dbm})_3$ , it shows two absorption bands at *ca.* 237 and 345 nm; and **1–6** show similar absorption curves at *ca.* 238, 337 and 416 nm due to the  $n \rightarrow \pi^*$  and  $\pi \rightarrow \pi^*$  transitions of ligands  $\text{L}^{2-}$  and  $\text{dbm}^-$ . Obviously, the bands appears to be red-shifted as a whole, which is the result of the introduction of  $\text{dbm}^-$  with an increase in the degree of conjugation. The  $\text{Dy}(\text{acac})_3 \cdot 2\text{H}_2\text{O}$  has two absorption bands centered at *ca.* 224 and 287 nm in the fig. S3 (b), and for **7–8** there are four absorption bands centered at *ca.* 239, 270, 298 and 397 nm ( $n \rightarrow \pi^*$  and  $\pi \rightarrow \pi^*$  transitions of ligands  $\text{L}^{2-}$  and  $\text{acac}^-$ ). Fig. S3 (c) displays that the absorption bands of  $\text{Dy}(\text{TTA})_3 \cdot 2\text{H}_2\text{O}$  are found at *ca.* 237, 275, and 341 nm and three absorption bands situated at *ca.* 234, 271 and 340 nm for **9** ( $n \rightarrow \pi^*$  and  $\pi \rightarrow \pi^*$  transitions of ligands  $\text{L}^{2-}$  and  $\text{TTA}^-$ ). Analogously, two primary absorption bands centered at *ca.* 233 and 292 nm can be observed for  $\text{Dy}(\text{tfa})_3 \cdot 2\text{H}_2\text{O}$ , and **10** possesses three absorption bands centered at *ca.* 237, 300 and 396 nm ( $n \rightarrow \pi^*$  and  $\pi \rightarrow \pi^*$  transitions of ligands  $\text{L}^{2-}$  and  $\text{tfa}^-$ ). In short, the absorption band positions of **1–10** are slightly different compared to the ligand  $\text{H}_2\text{L}$  own to the influence of different  $\beta$ -diketone co-ligands.

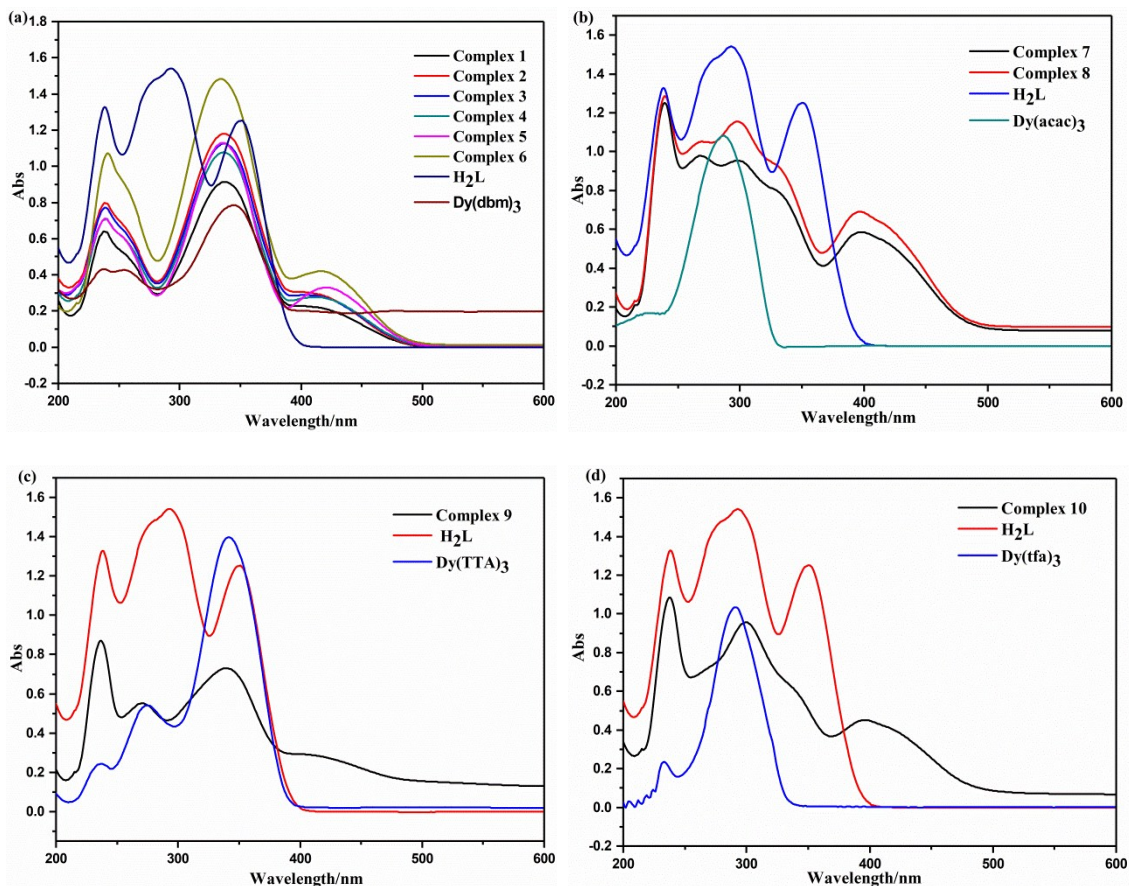

**Fig. S3** The UV-vis absorption spectra of  $\text{Dy}(\text{dbm})_3 \cdot 2\text{H}_2\text{O}$ ,  $\text{Dy}(\text{acac})_3 \cdot 2\text{H}_2\text{O}$ ,  $\text{Dy}(\text{TTA})_3 \cdot 2\text{H}_2\text{O}$ ,  $\text{Dy}(\text{tfa})_3 \cdot 2\text{H}_2\text{O}$ , the ligand  $\text{H}_2\text{L}$  and complexes **1–10**.

### Photoluminescence properties

The photoluminescence of complex **1** was measured in dichloromethane solution at room temperature. The emission spectrum of **1** at excitation wavelength of 335 nm reveals four characteristic emission bands of  $\text{Tb}^{3+}$ , corresponding to the  $^5\text{D}_4 \rightarrow ^7\text{F}_6$  (495nm),  $^5\text{D}_4 \rightarrow ^7\text{F}_5$  (536nm),  $^5\text{D}_4 \rightarrow ^7\text{F}_4$  (580nm),  $^5\text{D}_4 \rightarrow ^7\text{F}_3$  (605nm), respectively. Among them, the  $^5\text{D}_4 \rightarrow ^7\text{F}_5$  transition is the strongest (Fig. S4, ESI<sup>†</sup>).

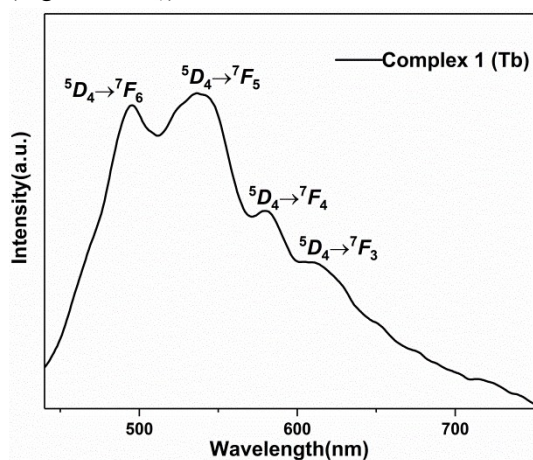

**Fig. S4** Room-temperature photoluminescence spectrum of complex **1** in dichloromethane solution.

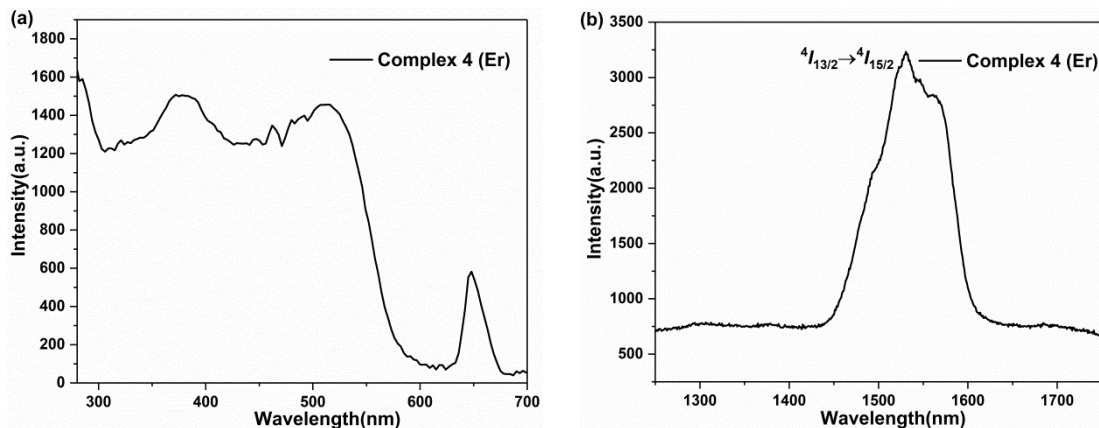

**Fig. S5** (a) Excitation spectrum ( $\lambda_{em} = 1528$  nm) and (b) emission spectrum of complex **4** ( $\lambda_{ex} = 375$  nm) in the solid state.

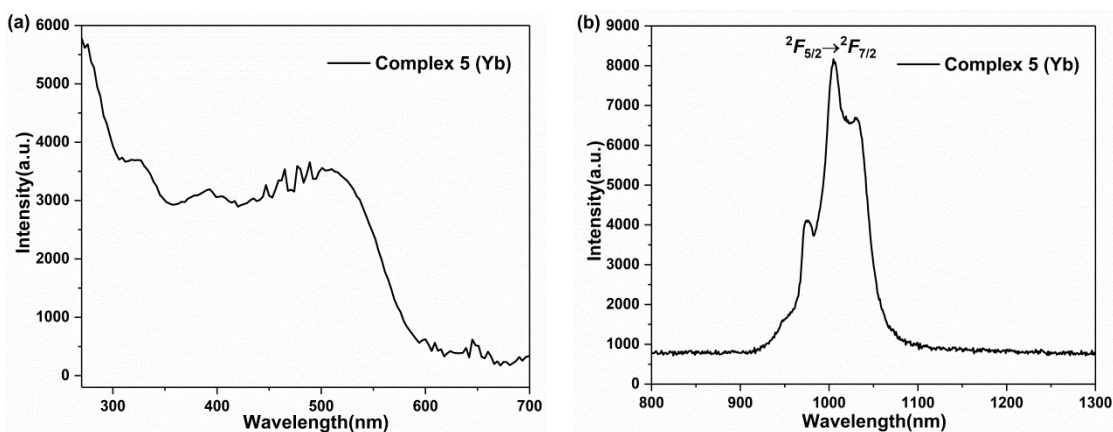

**Fig. S6** (a) Excitation spectrum ( $\lambda_{em} = 975$  nm) and (b) emission spectrum of complex **5** ( $\lambda_{ex} = 510$  nm) in the solid state.

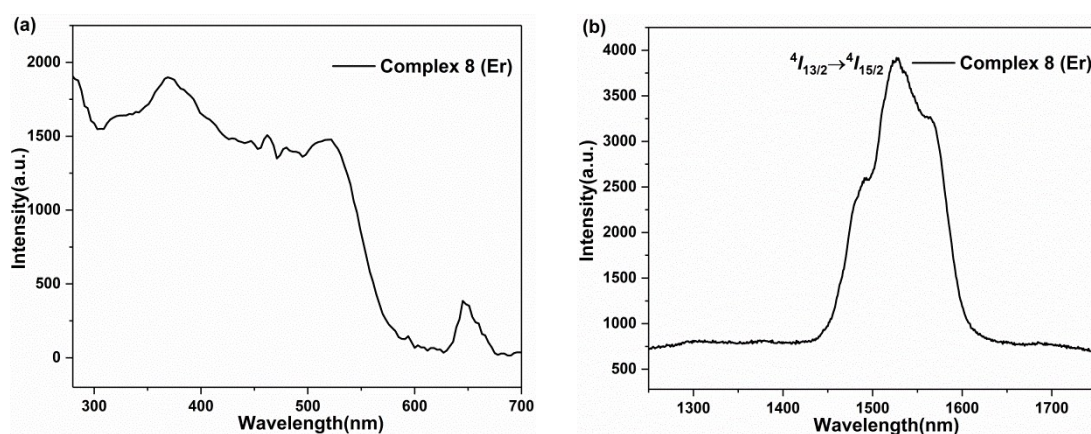

**Fig. S7** (a) Excitation spectrum ( $\lambda_{em} = 1528$  nm) and (b) emission spectrum of complex **8** ( $\lambda_{ex} = 370$  nm) in the solid state.

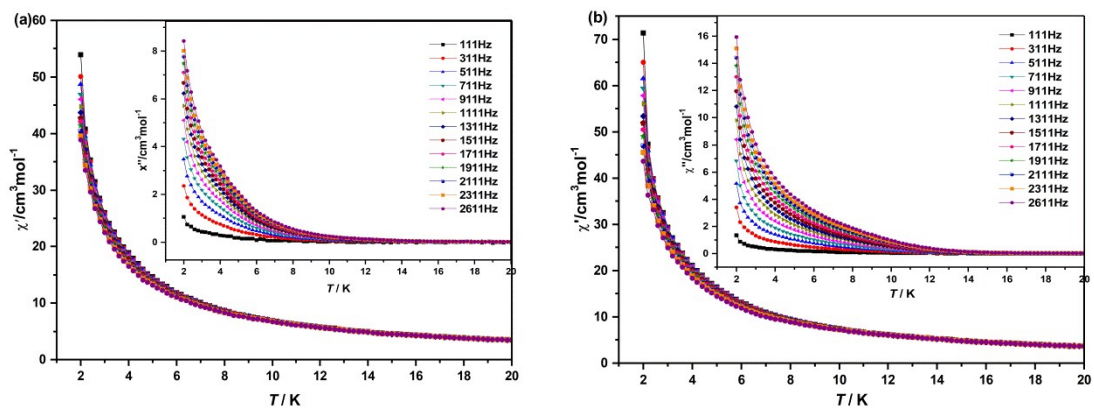

**Fig. S8** Temperature dependence of  $\chi'$  and  $\chi''$  for **2** (a) and **7**(b) in a zero static field and an oscillating field of 3 Oe (the solid lines connecting the data points are guides for the eye).

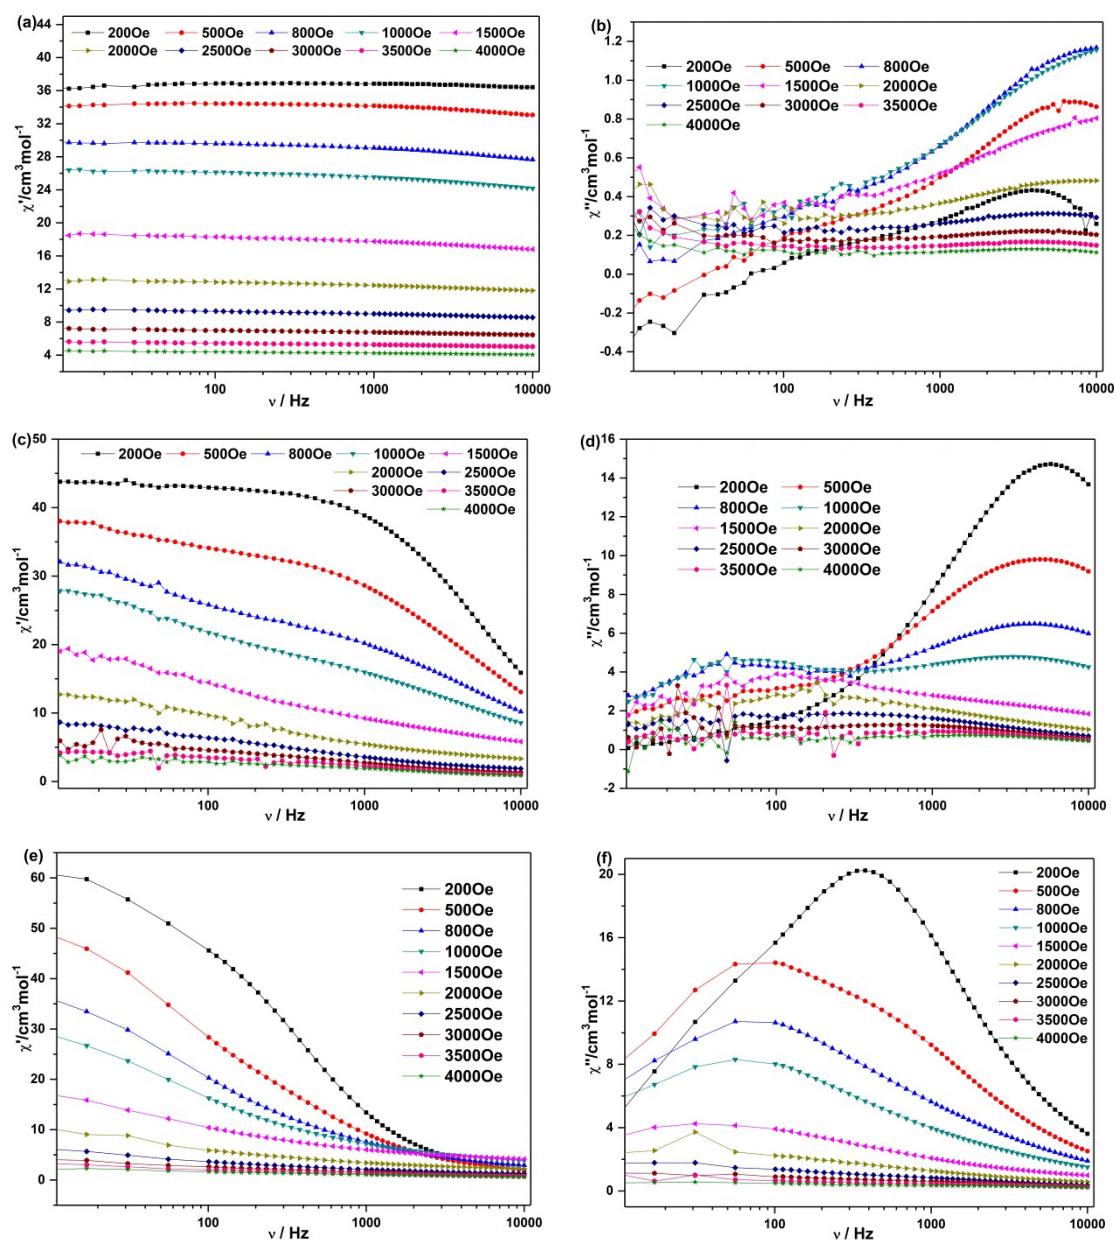

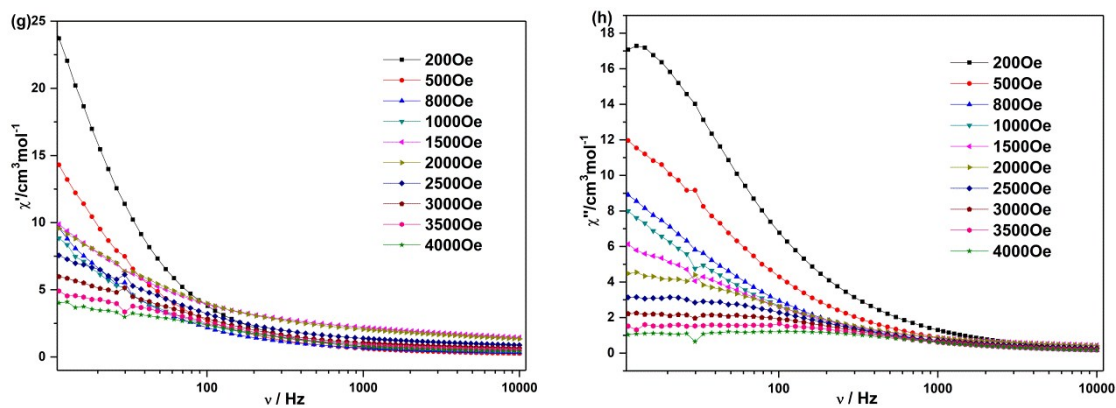

**Fig. S9** Frequency dependency of the ac susceptibility was measured on **2** (a,b), **7**(c,d), **9**(e,f) and **10**(g,h) under the applied field from 200 to 4000 Oe at 2.0 K (the solid lines connecting the data points are guides for the eye).

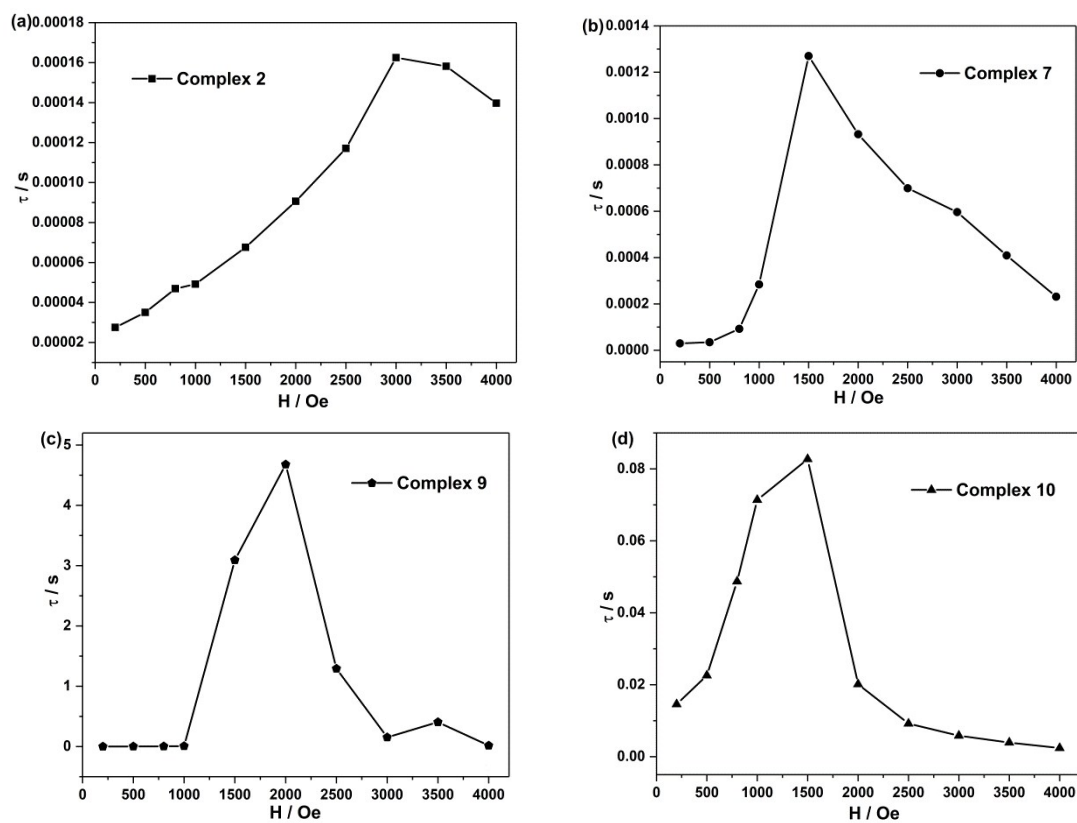

**Fig. S10** Field dependence of the magnetic relaxation time ( $\tau$ ), at 2 K for **2** (a), **7**(b), **9**(c) and **10**(d).

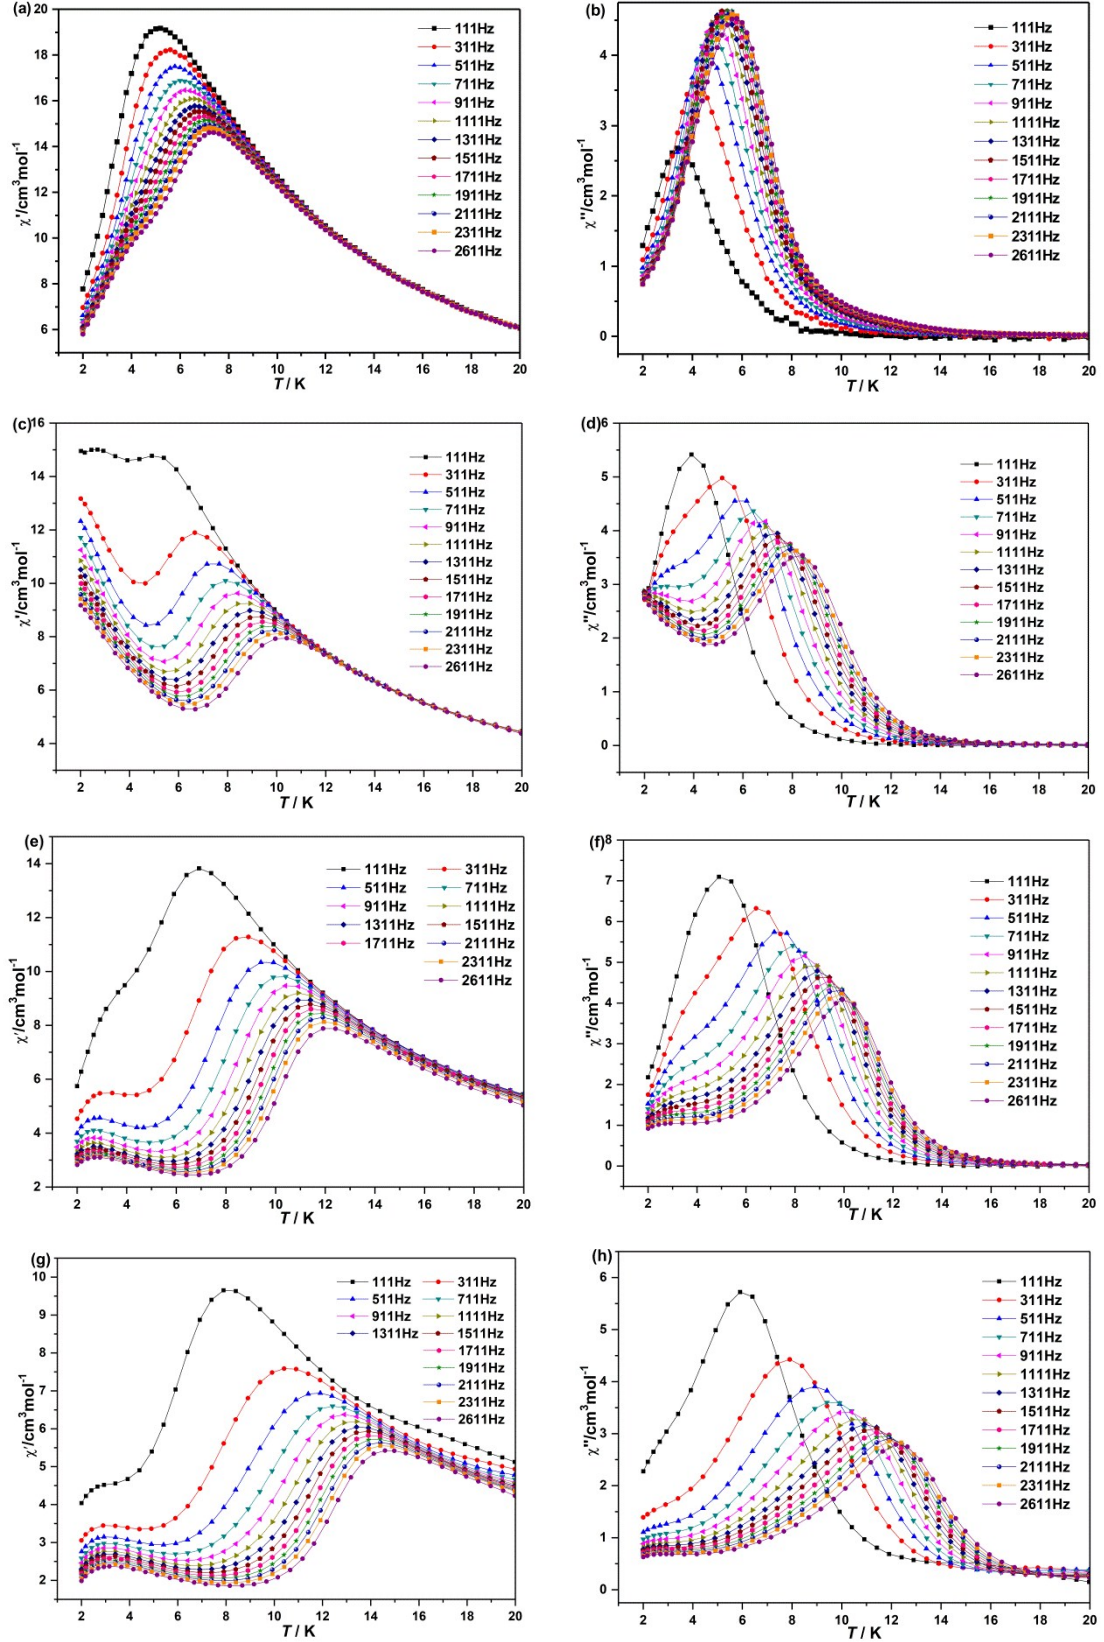

**Fig. S11** Temperature dependence of  $\chi'$  and  $\chi''$  for **2** ( $H_{dc} = 3000$  Oe, a and b), **7** ( $H_{dc} = 1500$  Oe, c and d), **9** ( $H_{dc} = 2000$  Oe, e and f) and **10** ( $H_{dc} = 1500$  Oe, g and h) in an oscillating field of 3 Oe. (the solid lines connecting the data points are guides for the eye).



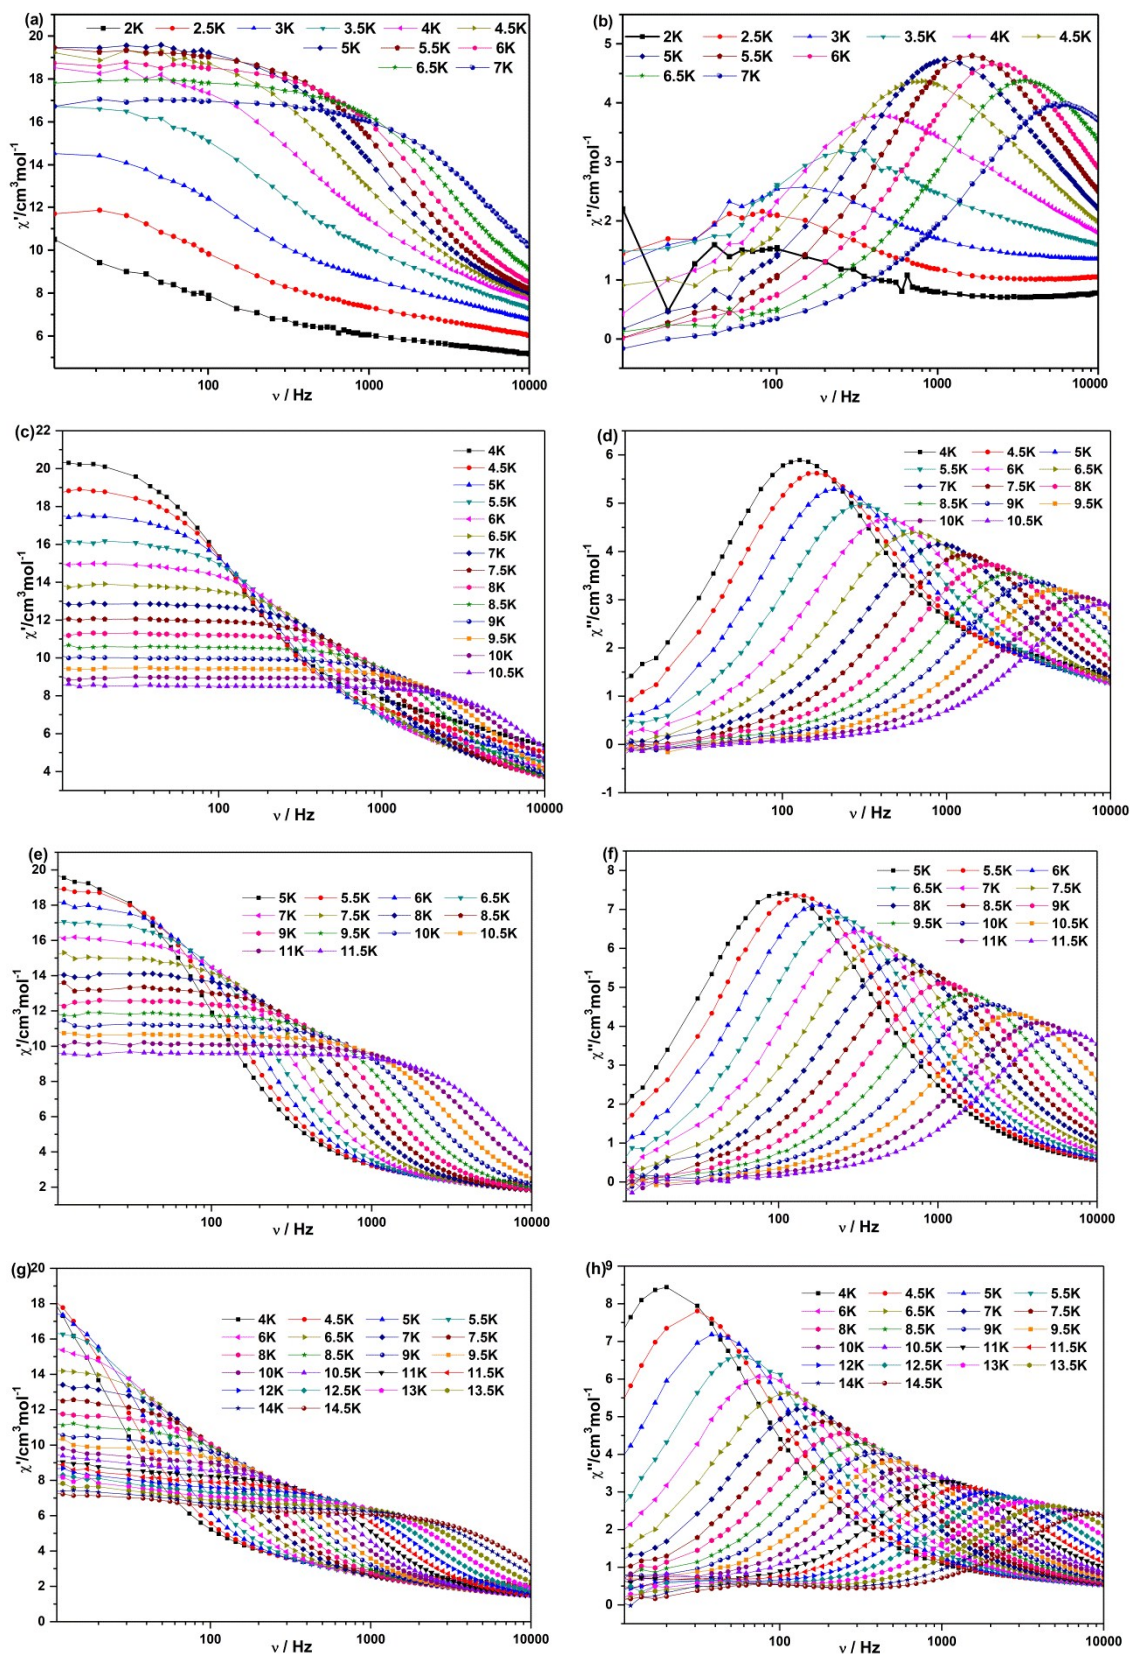

**Fig. S12** Frequency dependence of  $\chi'$  and  $\chi''$  for **2** ( $H_{dc} = 3000$  Oe, a and b), **7** ( $H_{dc} = 1500$  Oe, c and d), **9** ( $H_{dc} = 2000$  Oe, e and f) and **10** ( $H_{dc} = 1500$  Oe, g and h) in an oscillating field of 3 Oe. (the solid lines connecting the data points are guides for the eye).

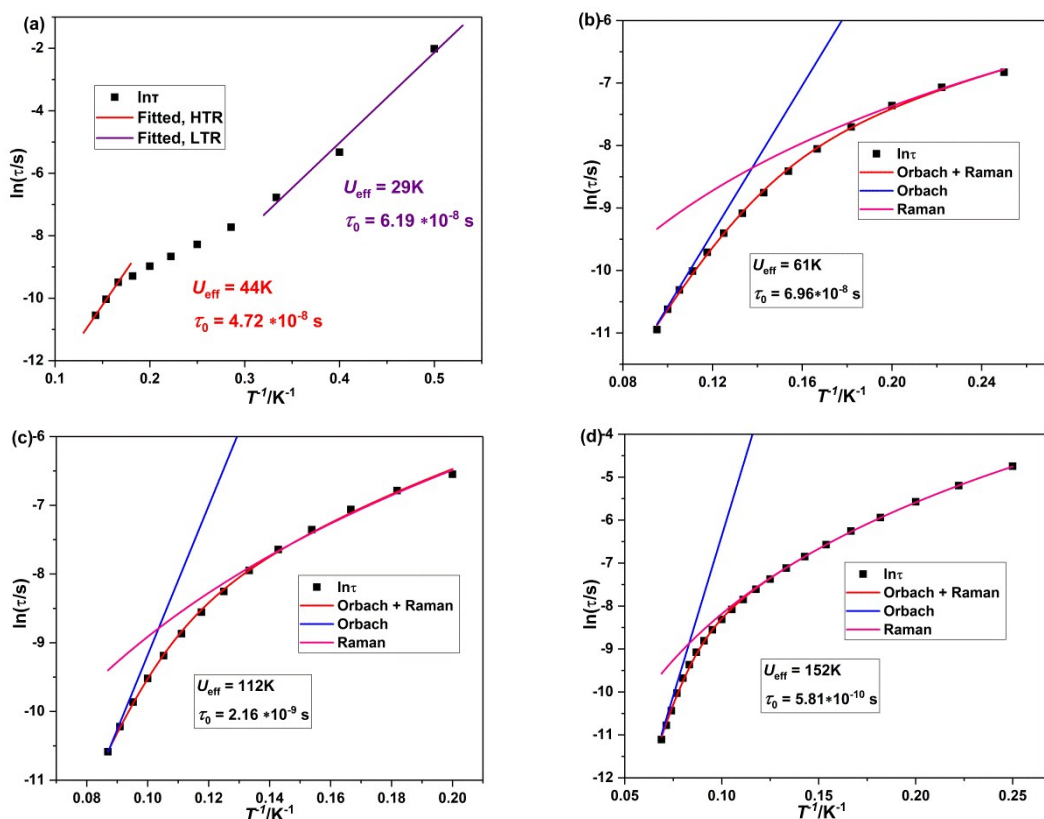

**Fig. S13** The  $\ln(\tau)$  versus  $1/T$  plots of **2**(a,  $H_{dc} = 3000$  Oe), **7**(b,  $H_{dc} = 1500$  Oe), **9**(c,  $H_{dc} = 2000$  Oe) and **10**(d) ( $H_{dc} = 1500$  Oe); the red lines correspond to the best fit.

**Table S1** Crystal data and structure refinement for complexes **1–5**

| Complex                                 | 1                           | 2                           | 3                           | 4                           | 5                           |
|-----------------------------------------|-----------------------------|-----------------------------|-----------------------------|-----------------------------|-----------------------------|
| Formula                                 | $C_{58}H_{50}N_8O_{10}Tb_2$ | $C_{58}H_{50}N_8O_{10}Dy_2$ | $C_{58}H_{50}N_8O_{10}Ho_2$ | $C_{58}H_{50}N_8O_{10}Er_2$ | $C_{58}H_{50}N_8O_{10}Yb_2$ |
| Mr(g.mol <sup>-1</sup> )                | 1336.9                      | 1344.06                     | 1348.92                     | 1353.58                     | 1365.14                     |
| Temperature(K)                          | 113(2)                      | 113(2)                      | 113(2)                      | 113(2)                      | 113(2)                      |
| Wavelength(Å)                           | 0.71073                     | 0.71073                     | 0.71073                     | 0.71073                     | 0.71073                     |
| Crystal system                          | Orthorhombic                | Orthorhombic                | Orthorhombic                | Orthorhombic                | Orthorhombic                |
| Space group                             | <i>Pbcn</i>                 | <i>Pbcn</i>                 | <i>Pbcn</i>                 | <i>Pbcn</i>                 | <i>Pbcn</i>                 |
| a(Å)                                    | 22.133(4)                   | 22.136(4)                   | 22.114(4)                   | 22.064(4)                   | 22.018(4)                   |
| b(Å)                                    | 9.924(2)                    | 9.903(2)                    | 9.879(2)                    | 9.869(2)                    | 9.815(2)                    |
| c(Å)                                    | 24.477(5)                   | 24.489(5)                   | 24.526(5)                   | 24.538(5)                   | 24.552(5)                   |
| $\alpha$ (deg)                          | 90                          | 90                          | 90                          | 90                          | 90                          |
| $\beta$ (deg)                           | 90                          | 90                          | 90                          | 90                          | 90                          |
| $\gamma$ (deg)                          | 90                          | 90                          | 90                          | 90                          | 90                          |
| Volume(Å <sup>3</sup> )                 | 5376.3(19)                  | 5368.3(19)                  | 5357.9(19)                  | 5343.4(19)                  | 5306.1(18)                  |
| Z                                       | 4                           | 4                           | 4                           | 4                           | 4                           |
| Calculated density(Mg m <sup>-3</sup> ) | 1.652                       | 1.663                       | 1.672                       | 1.683                       | 1.709                       |
| Abs coeff(mm <sup>-1</sup> )            | 2.677                       | 2.83                        | 3.000                       | 3.187                       | 3.572                       |
| F(000)                                  | 2656                        | 2664                        | 2672                        | 2680                        | 2696                        |
| Crystal size(mm <sup>3</sup> )          | 0.100x0.080                 | 0.200x0.180                 | 0.200x0.180                 | 0.200x0.180                 | 0.100x0.060                 |

|                                                 | x0.080                                  | x0.120                                  | x0.120                                  | x0.120                                  | x0.060                                  |
|-------------------------------------------------|-----------------------------------------|-----------------------------------------|-----------------------------------------|-----------------------------------------|-----------------------------------------|
| $\theta$ range(°)                               | 2.880-25.018                            | 2.801-25.018                            | 1.842-25.019                            | 1.660-25.017                            | 1.659-27.898                            |
| Limiting indices                                | -26<=h<=26                              | -26<=h<=26                              | -26<=h<=26                              | -26<=h<=26                              | -28<=h<=28                              |
|                                                 | -11<=k<=11                              | -11<=k<=11                              | -11<=k<=11                              | -11<=k<=11                              | -12<=k<=12                              |
|                                                 | -29<=l<=29                              | -27<=l<=29                              | -25<=l<=29                              | -29<=l<=29                              | -32<=l<=26                              |
| Reflections collected                           | 49077                                   | 40835                                   | 40550                                   | 48605                                   | 48474                                   |
| Independent reflection                          | 4719[R(int)=0.0843]                     | 4717[R(int)=0.0738]                     | 4721[R(int)=0.0794]                     | 4681[R(int)=0.0923]                     | 6301[R(int)=0.1118]                     |
| Completeness                                    | 99.50%                                  | 99.60%                                  | 99.90%                                  | 99.20%                                  | 99.90%                                  |
| Max. and min. transmission                      | 1 and 0.8188                            | 1 and 0.8057                            | 1 and 0.8318                            | 1 and 0.8696                            | 1 and 0.7919                            |
| Data/restraints /parameters                     | 4719/12/355                             | 4717/0/354                              | 4721/12/354                             | 4681/0/355                              | 6301/24/355                             |
| GoF on F2                                       | 1.047                                   | 1.066                                   | 1.118                                   | 1.090                                   | 1.301                                   |
| Final R indices [ $I > 2\sigma(I)$ ]            | $R_1^a = 0.0359$ ,<br>$wR_2^b = 0.0851$ | $R_1^a = 0.0358$ ,<br>$wR_2^b = 0.0903$ | $R_1^a = 0.0338$ ,<br>$wR_2^b = 0.0677$ | $R_1^a = 0.0412$ ,<br>$wR_2^b = 0.0897$ | $R_1^a = 0.0833$ ,<br>$wR_2^b = 0.1397$ |
| R indices (all data)                            | $R_1 = 0.0489$ ,<br>$wR_2 = 0.0908$     | $R_1 = 0.0465$ ,<br>$wR_2 = 0.0966$     | $R_1 = 0.0506$ ,<br>$wR_2 = 0.0745$     | $R_1 = 0.0610$ ,<br>$wR_2 = 0.0979$     | $R_1 = 0.1002$ ,<br>$wR_2 = 0.1455$     |
| Largest diff. peak and hole (eÅ <sup>-3</sup> ) | 1.886 and -0.875                        | 1.525 and -0.921                        | 1.90 and -0.82                          | 1.859 and -0.909                        | 1.97 and -1.68                          |

<sup>a</sup> $R_1 = \sum(|F_o| - |F_c|) / \sum |F_o|$ . <sup>b</sup> $wR_2 = [\sum w(|F_o|^2 - |F_c|^2)^2 / \sum w(F_o^2)]^{1/2}$

**Table S2** Crystal data and structure refinement for complexes **6–10**

| Complex                                 | <b>6</b>                                                                       | <b>7</b>                                                                       | <b>8</b>                                                                       | <b>9</b>                                                                                                                     | <b>10</b>                                                                                     |
|-----------------------------------------|--------------------------------------------------------------------------------|--------------------------------------------------------------------------------|--------------------------------------------------------------------------------|------------------------------------------------------------------------------------------------------------------------------|-----------------------------------------------------------------------------------------------|
| Formula                                 | C <sub>58</sub> H <sub>50</sub> N <sub>8</sub> O <sub>10</sub> Lu <sub>2</sub> | C <sub>40</sub> H <sub>46</sub> N <sub>8</sub> O <sub>10</sub> Dy <sub>2</sub> | C <sub>40</sub> H <sub>46</sub> N <sub>8</sub> O <sub>10</sub> Er <sub>2</sub> | C <sub>46</sub> H <sub>38</sub> Cl <sub>4</sub> F <sub>6</sub> N <sub>8</sub> O <sub>10</sub> S <sub>2</sub> Dy <sub>2</sub> | C <sub>40</sub> H <sub>44</sub> F <sub>6</sub> N <sub>8</sub> O <sub>12</sub> Dy <sub>2</sub> |
| Mr(g.mol <sup>-1</sup> )                | 1369.00                                                                        | 1123.85                                                                        | 1133.37                                                                        | 1507.76                                                                                                                      | 1267.83                                                                                       |
| Temperature(K)                          | 113(2)                                                                         | 113(2)                                                                         | 113(2)                                                                         | 113(2)                                                                                                                       | 113(2)                                                                                        |
| Wavelength(Å)                           | 0.71073                                                                        | 0.71073                                                                        | 0.71073                                                                        | 0.71073                                                                                                                      | 0.71073                                                                                       |
| Crystal system                          | Orthorhombic                                                                   | Triclinic                                                                      | Triclinic                                                                      | Triclinic                                                                                                                    | Triclinic                                                                                     |
| Space group                             | <i>P</i> bcn                                                                   | <i>P</i> $\bar{1}$                                                             | <i>P</i> $\bar{1}$                                                             | <i>P</i> $\bar{1}$                                                                                                           | <i>P</i> $\bar{1}$                                                                            |
| a(Å)                                    | 21.973(4)                                                                      | 9.4103(19)                                                                     | 9.4070(19)                                                                     | 10.583(2)                                                                                                                    | 9.2010(18)                                                                                    |
| b(Å)                                    | 9.826(2)                                                                       | 11.313(2)                                                                      | 11.300(2)                                                                      | 11.808(2)                                                                                                                    | 10.889(2)                                                                                     |
| c(Å)                                    | 24.585(5)                                                                      | 11.787(2)                                                                      | 11.706(2)                                                                      | 12.599(3)                                                                                                                    | 12.038(2)                                                                                     |
| $\alpha$ (deg)                          | 90                                                                             | 85.53(3)                                                                       | 85.25(3)                                                                       | 113.07(3)                                                                                                                    | 73.38(3)                                                                                      |
| $\beta$ (deg)                           | 90                                                                             | 68.11(3)                                                                       | 68.20(3)                                                                       | 104.13(3)                                                                                                                    | 85.05(3)                                                                                      |
| $\gamma$ (deg)                          | 90                                                                             | 67.45(3)                                                                       | 67.24(3)                                                                       | 102.28(3)                                                                                                                    | 86.60(3)                                                                                      |
| Volume(Å <sup>3</sup> )                 | 5308.5(18)                                                                     | 1072.2(5)                                                                      | 1062.7(5)                                                                      | 1318.1(6)                                                                                                                    | 1150.6(4)                                                                                     |
| Z                                       | 4                                                                              | 1                                                                              | 1                                                                              | 1                                                                                                                            | 1                                                                                             |
| Calculated density(Mg m <sup>-3</sup> ) | 1.713                                                                          | 1.740                                                                          | 1.771                                                                          | 1.899                                                                                                                        | 1.83                                                                                          |
| Abs coeff(mm <sup>-1</sup> )            | 3.766                                                                          | 3.523                                                                          | 3.987                                                                          | 3.180                                                                                                                        | 3.315                                                                                         |
| F(000)                                  | 2704                                                                           | 554                                                                            | 558                                                                            | 736                                                                                                                          | 622                                                                                           |

|                                                  |                                                                                |                                                                                |                                                                                |                                                                                |                                                                                |
|--------------------------------------------------|--------------------------------------------------------------------------------|--------------------------------------------------------------------------------|--------------------------------------------------------------------------------|--------------------------------------------------------------------------------|--------------------------------------------------------------------------------|
| Crystal size(mm <sup>3</sup> )                   | 0.200 x 0.180 x<br>0.120                                                       | 0.200x0.180x0.120                                                              | 0.200x0.180x0.1<br>20                                                          | 0.200x0.180x0.120                                                              | 0.200x0.180x0.120                                                              |
| $\theta$ range(°)                                | 1.854 - 25.017                                                                 | 1.867-27.931                                                                   | 2.532 - 27.843                                                                 | 1.998-25.020                                                                   | 1.770-25.020                                                                   |
| Limiting indices                                 | -26<=h<=25<br>-11<=k<=11<br>-28<=l<=29                                         | -12<=h<=12<br>-14<=k<=14<br>-15<=l<=15                                         | -12<=h<=11<br>-14<=k<=14<br>-15<=l<=15                                         | -12<=h<=12<br>-14<=k<=14<br>-14<=l<=14                                         | -10<=h<=10<br>-12<=k<=12<br>14<=l<=14                                          |
| Reflections collected                            | 32676                                                                          | 12976                                                                          | 12448                                                                          | 12858                                                                          | 11171                                                                          |
| Independent reflection                           | 4680 [R(int)<br>= 0.0721]                                                      | 5103[R(int)<br>= 0.0362]                                                       | 5000 [R(int)<br>= 0.0412]                                                      | 4626 [R(int)<br>= 0.0391]                                                      | 4051[R(int)<br>= 0.0496]                                                       |
| Completeness                                     | 99.9 %                                                                         | 99.90%                                                                         | 99.3%                                                                          | 99.7%                                                                          | 99.90%                                                                         |
| Max.and min.<br>transmission                     | 1 and 0.6301                                                                   | 1 and 0.8323                                                                   | 1 and 0.6767                                                                   | 1 and 0.8529                                                                   | 1 and 0.4974                                                                   |
| Data/restraints/parameters                       | 4680 / 0 / 354                                                                 | 5103 / 0 / 275                                                                 | 5000 / 0 / 275                                                                 | 4626 / 0 / 355                                                                 | 4051 / 18 / 312                                                                |
| GoF on F2                                        | 1.051                                                                          | 1.072                                                                          | 1.002                                                                          | 1.088                                                                          | 1.098                                                                          |
| Final R<br>indices[I>2 $\sigma$ (I)]             | R <sub>1</sub> <sup>a</sup> = 0.0548,<br>wR <sub>2</sub> <sup>b</sup> = 0.1760 | R <sub>1</sub> <sup>a</sup> = 0.0262,<br>wR <sub>2</sub> <sup>b</sup> = 0.0597 | R <sub>1</sub> <sup>a</sup> = 0.0257,<br>wR <sub>2</sub> <sup>b</sup> = 0.0653 | R <sub>1</sub> <sup>a</sup> = 0.0386,<br>wR <sub>2</sub> <sup>b</sup> = 0.1105 | R <sub>1</sub> <sup>a</sup> = 0.0298,<br>wR <sub>2</sub> <sup>b</sup> = 0.0745 |
| R indices(all data)                              | R <sub>1</sub> = 0.0630,<br>wR <sub>2</sub> = 0.1889                           | R <sub>1</sub> = 0.0299,<br>wR <sub>2</sub> = 0.0613                           | R <sub>1</sub> = 0.0277,<br>wR <sub>2</sub> = 0.0709                           | R <sub>1</sub> = 0.0440,<br>wR <sub>2</sub> = 0.1387                           | R <sub>1</sub> = 0.0345,<br>wR <sub>2</sub> = 0.0875                           |
| Largest diff.peak and<br>hole(eÅ <sup>-3</sup> ) | 1.427 and -1.549                                                               | 1.143 and<br>-1.584                                                            | 0.972 and -1.659                                                               | 1.499 and<br>-1.734                                                            | 1.326 and<br>-1.024                                                            |

<sup>a</sup>R<sub>1</sub> =  $\sum(|F_o| - |F_c|) / \sum|F_o|$ . <sup>b</sup>wR<sub>2</sub> =  $[\sum w(|F_o|^2 - |F_c|^2)^2 / \sum w(F_o^2)^2]^{1/2}$

**Table S3** The important bond lengths (Å) and angles (°) for **1-10**

| Complexes | The range of Ln–O bond<br>lengths / Å | Average Ln–O<br>bond lengths | The distance of<br>Ln...Ln / Å | The Ln–O–Ln<br>bond angles / ° |
|-----------|---------------------------------------|------------------------------|--------------------------------|--------------------------------|
| 1         | 2.219(3) - 2.406(3)                   | 2.349(8)                     | 3.9834(7)                      | 112.80(12)                     |
| 2         | 2.201(3) - 2.402(3)                   | 2.339(5)                     | 3.9733(7)                      | 113.01(12)                     |
| 3         | 2.207(3) - 2.383(3)                   | 2.329(1)                     | 3.9603(7)                      | 113.30(12)                     |
| 4         | 2.198(4) - 2.373(4)                   | 2.317(2)                     | 3.9487(7)                      | 113.38(15)                     |
| 5         | 2.175(5) - 2.358(6)                   | 2.295(7)                     | 3.9244(9)                      | 114.2(2)                       |
| 6         | 2.176(6) - 2.351(6)                   | 2.294(3)                     | 3.9139(9)                      | 114.2(2)                       |
| 7         | 2.202(2) - 2.433(2)                   | 2.343(9)                     | 3.9526(11)                     | 112.30(8)                      |
| 8         | 2.196(2) - 2.395(3)                   | 2.313(9)                     | 3.9228(11)                     | 112.75(9)                      |
| 9         | 2.196(5) - 2.414(5)                   | 2.351(3)                     | 3.992(2)                       | 114.46(17)                     |
| 10        | 2.173(3) - 2.458(3)                   | 2.338(2)                     | 3.9108(10)                     | 111.70(12)                     |

**Table S4** The selected bond lengths (Å) and angles (°) for **2**

|               |           |              |          |
|---------------|-----------|--------------|----------|
| Dy(1)-O(2)    | 2.201(3)  | Dy(1)-O(3)   | 2.326(3) |
| Dy(1)-O(4)    | 2.355(3)  | Dy(1)-O(1)#1 | 2.363(3) |
| Dy(1)-O(5)    | 2.388(3)  | Dy(1)-O(1)   | 2.402(3) |
| Dy(1)-N(4)    | 2.419(4)  | Dy(1)-N(1)#1 | 2.575(4) |
| Dy(1)-Dy(1)#1 | 3.9733(7) |              |          |

|                     |            |                      |            |
|---------------------|------------|----------------------|------------|
| Dy(1)#1-O(1)-Dy(1)  | 113.01(12) |                      |            |
| O(2)-Dy(1)-O(3)     | 76.23(12)  | O(2)-Dy(1)-O(4)      | 131.42(11) |
| O(3)-Dy(1)-O(4)     | 71.10(11)  | O(2)-Dy(1)-O(1)#1    | 146.54(11) |
| O(3)-Dy(1)-O(1)#1   | 112.04(11) | O(4)-Dy(1)-O(1)#1    | 80.27(10)  |
| O(2)-Dy(1)-O(5)     | 75.77(12)  | O(3)-Dy(1)-O(5)      | 142.35(11) |
| O(4)-Dy(1)-O(5)     | 146.17(10) | O(1)#1-Dy(1)-O(5)    | 80.17(11)  |
| O(2)-Dy(1)-O(1)     | 126.28(11) | O(3)-Dy(1)-O(1)      | 143.15(11) |
| O(4)-Dy(1)-O(1)     | 72.57(10)  | O(1)#1-Dy(1)-O(1)    | 66.99(12)  |
| O(5)-Dy(1)-O(1)     | 74.45(11)  | O(2)-Dy(1)-N(4)      | 74.01(12)  |
| O(3)-Dy(1)-N(4)     | 101.50(11) | O(4)-Dy(1)-N(4)      | 78.41(12)  |
| O(1)#1-Dy(1)-N(4)   | 131.30(11) | O(5)-Dy(1)-N(4)      | 94.41(12)  |
| O(1)-Dy(1)-N(4)     | 64.98(11)  | O(2)-Dy(1)-N(1)#1    | 86.75(12)  |
| O(3)-Dy(1)-N(1)#1   | 78.51(12)  | O(4)-Dy(1)-N(1)#1    | 119.61(12) |
| O(1)#1-Dy(1)-N(1)#1 | 64.66(11)  | O(5)-Dy(1)-N(1)#1    | 75.27(12)  |
| O(1)-Dy(1)-N(1)#1   | 126.11(11) | N(4)-Dy(1)-N(1)#1    | 160.01(12) |
| O(2)-Dy(1)-Dy(1)#1  | 148.63(9)  | O(3)-Dy(1)-Dy(1)#1   | 134.98(8)  |
| O(4)-Dy(1)-Dy(1)#1  | 73.65(7)   | O(1)#1-Dy(1)-Dy(1)#1 | 33.80(7)   |
| O(5)-Dy(1)-Dy(1)#1  | 74.72(8)   | O(1)-Dy(1)-Dy(1)#1   | 33.18(7)   |
| N(4)-Dy(1)-Dy(1)#1  | 97.86(8)   | N(1)#1-Dy(1)-Dy(1)#1 | 95.84(8)   |

Symmetry transformations used to generate equivalent atoms: #1 -x+2,-y+1,-z+1

**Table S5** The selected bond lengths (Å) and angles (°) for **7**

|                     |            |                     |           |
|---------------------|------------|---------------------|-----------|
| Dy(1)-O(2)#1        | 2.202(2)   | Dy(1)-O(4)          | 2.321(2)  |
| Dy(1)-O(3)          | 2.347(2)   | Dy(1)-O(1)          | 2.368(2)  |
| Dy(1)-O(1)#1        | 2.391(2)   | Dy(1)-O(5)          | 2.433(2)  |
| Dy(1)-N(4)#1        | 2.459(3)   | Dy(1)-N(1)          | 2.548(2)  |
| Dy(1)-Dy(1)#1       | 3.9526(11) |                     |           |
| Dy(1)-O(1)-Dy(1)#1  | 112.30(8)  |                     |           |
| O(2)#1-Dy(1)-O(4)   | 75.74(9)   | O(2)#1-Dy(1)-O(3)   | 133.02(8) |
| O(4)-Dy(1)-O(3)     | 71.71(8)   | O(2)#1-Dy(1)-O(1)   | 144.05(7) |
| O(4)-Dy(1)-O(1)     | 118.68(8)  | O(3)-Dy(1)-O(1)     | 82.25(7)  |
| O(2)#1-Dy(1)-O(1)#1 | 122.74(8)  | O(4)-Dy(1)-O(1)#1   | 142.18(8) |
| O(3)-Dy(1)-O(1)#1   | 72.59(7)   | O(1)-Dy(1)-O(1)#1   | 67.70(8)  |
| O(2)#1-Dy(1)-O(5)   | 74.98(8)   | O(4)-Dy(1)-O(5)     | 140.66(8) |
| O(3)-Dy(1)-O(5)     | 146.92(7)  | O(1)-Dy(1)-O(5)     | 74.88(8)  |
| O(1)#1-Dy(1)-O(5)   | 76.72(7)   | O(2)#1-Dy(1)-N(4)#1 | 73.51(8)  |
| O(4)-Dy(1)-N(4)#1   | 96.21(8)   | O(3)-Dy(1)-N(4)#1   | 77.33(8)  |
| O(1)-Dy(1)-N(4)#1   | 131.09(7)  | O(1)#1-Dy(1)-N(4)#1 | 63.89(8)  |
| O(5)-Dy(1)-N(4)#1   | 100.04(8)  | O(2)#1-Dy(1)-N(1)   | 90.60(8)  |
| O(4)-Dy(1)-N(1)     | 76.04(8)   | O(3)-Dy(1)-N(1)     | 112.73(8) |
| O(1)-Dy(1)-N(1)     | 64.54(7)   | O(1)#1-Dy(1)-N(1)   | 130.33(7) |

|                      |           |                    |           |
|----------------------|-----------|--------------------|-----------|
| O(5)-Dy(1)-N(1)      | 78.57(8)  | N(4)#1-Dy(1)-N(1)  | 163.73(8) |
| O(2)#1-Dy(1)-Dy(1)#1 | 144.31(6) | O(4)-Dy(1)-Dy(1)#1 | 139.95(6) |
| O(3)-Dy(1)-Dy(1)#1   | 74.83(6)  | O(1)-Dy(1)-Dy(1)#1 | 34.04(5)  |
| O(1)#1-Dy(1)-Dy(1)#1 | 33.67(5)  | O(5)-Dy(1)-Dy(1)#1 | 72.82(6)  |
| N(4)#1-Dy(1)-Dy(1)#1 | 97.33(6)  | N(1)-Dy(1)-Dy(1)#1 | 97.70(6)  |

Symmetry transformations used to generate equivalent atoms: #1 -x+2,-y,-z+1

**Table S6** The selected bond lengths (Å) and angles (°) for **9**

|                     |            |                      |            |
|---------------------|------------|----------------------|------------|
| Dy(1)-O(2)          | 2.196(5)   | Dy(1)-O(1)#1         | 2.366(5)   |
| Dy(1)-O(4)          | 2.372(5)   | Dy(1)-O(3)           | 2.375(5)   |
| Dy(1)-O(1)          | 2.382(4)   | Dy(1)-O(5)           | 2.414(5)   |
| Dy(1)-N(4)          | 2.455(6)   | Dy(1)-N(1)#1         | 2.556(6)   |
| Dy(1)-Dy(1)#1       | 3.992(2)   |                      |            |
| Dy(1)#1-O(1)-Dy(1)  | 114.46(17) |                      |            |
| O(2)-Dy(1)-O(1)#1   | 141.94(17) | O(2)-Dy(1)-O(4)      | 132.31(18) |
| O(1)#1-Dy(1)-O(4)   | 83.69(17)  | O(2)-Dy(1)-O(3)      | 73.33(19)  |
| O(1)#1-Dy(1)-O(3)   | 118.55(17) | O(4)-Dy(1)-O(3)      | 70.48(17)  |
| O(2)-Dy(1)-O(1)     | 128.07(18) | O(1)#1-Dy(1)-O(1)    | 65.54(18)  |
| O(4)-Dy(1)-O(1)     | 74.31(17)  | O(3)-Dy(1)-O(1)      | 143.53(17) |
| O(2)-Dy(1)-O(5)     | 75.74(18)  | O(1)#1-Dy(1)-O(5)    | 74.65(17)  |
| O(4)-Dy(1)-O(5)     | 148.34(17) | O(3)-Dy(1)-O(5)      | 140.50(17) |
| O(1)-Dy(1)-O(5)     | 75.78(17)  | O(2)-Dy(1)-N(4)      | 74.09(18)  |
| O(1)#1-Dy(1)-N(4)   | 129.45(16) | O(4)-Dy(1)-N(4)      | 85.16(18)  |
| O(3)-Dy(1)-N(4)     | 103.40(19) | O(1)-Dy(1)-N(4)      | 63.96(16)  |
| O(5)-Dy(1)-N(4)     | 90.97(18)  | O(2)-Dy(1)-N(1)#1    | 87.10(18)  |
| O(1)#1-Dy(1)-N(1)#1 | 64.59(17)  | O(4)-Dy(1)-N(1)#1    | 111.52(18) |
| O(3)-Dy(1)-N(1)#1   | 74.69(19)  | O(1)-Dy(1)-N(1)#1    | 128.55(17) |
| O(5)-Dy(1)-N(1)#1   | 79.83(18)  | N(4)-Dy(1)-N(1)#1    | 160.7(2)   |
| O(2)-Dy(1)-Dy(1)#1  | 146.56(14) | O(1)#1-Dy(1)-Dy(1)#1 | 32.89(11)  |
| O(4)-Dy(1)-Dy(1)#1  | 76.91(12)  | O(3)-Dy(1)-Dy(1)#1   | 139.73(13) |
| O(1)-Dy(1)-Dy(1)#1  | 32.65(11)  | O(5)-Dy(1)-Dy(1)#1   | 72.34(12)  |
| N(4)-Dy(1)-Dy(1)#1  | 96.59(13)  | N(1)#1-Dy(1)-Dy(1)#1 | 96.75(14)  |

Symmetry transformations used to generate equivalent atoms: #1 -x+1,-y+1,-z+2

**Table S7** The selected bond lengths (Å) and angles (°) for **10**

|                    |            |            |          |
|--------------------|------------|------------|----------|
| Dy(1)-O(1)#1       | 2.173(3)   | Dy(1)-O(4) | 2.313(4) |
| Dy(1)-O(2)         | 2.351(3)   | Dy(1)-O(3) | 2.357(3) |
| Dy(1)-O(2)#1       | 2.375(3)   | Dy(1)-O(5) | 2.458(3) |
| Dy(1)-N(1)#1       | 2.487(4)   | Dy(1)-N(3) | 2.557(4) |
| Dy(1)-Dy(1)#1      | 3.9108(10) |            |          |
| Dy(1)-O(2)-Dy(1)#1 | 111.70(12) |            |          |

|                      |            |                     |            |
|----------------------|------------|---------------------|------------|
| O(1)#1-Dy(1)-O(4)    | 115.01(14) | O(1)#1-Dy(1)-O(2)   | 149.06(12) |
| O(4)-Dy(1)-O(2)      | 90.82(12)  | O(1)#1-Dy(1)-O(3)   | 82.39(13)  |
| O(4)-Dy(1)-O(3)      | 72.33(13)  | O(2)-Dy(1)-O(3)     | 90.23(11)  |
| O(1)#1-Dy(1)-O(2)#1  | 134.14(12) | O(4)-Dy(1)-O(2)#1   | 71.46(12)  |
| O(2)-Dy(1)-O(2)#1    | 68.30(12)  | O(3)-Dy(1)-O(2)#1   | 137.17(12) |
| O(1)#1-Dy(1)-O(5)    | 81.58(13)  | O(4)-Dy(1)-O(5)     | 140.64(12) |
| O(2)-Dy(1)-O(5)      | 88.92(11)  | O(3)-Dy(1)-O(5)     | 147.02(12) |
| O(2)#1-Dy(1)-O(5)    | 71.97(12)  | O(1)#1-Dy(1)-N(1)#1 | 73.96(14)  |
| O(4)-Dy(1)-N(1)#1    | 74.47(13)  | O(2)-Dy(1)-N(1)#1   | 132.39(12) |
| O(3)-Dy(1)-N(1)#1    | 125.32(13) | O(2)#1-Dy(1)-N(1)#1 | 64.09(12)  |
| O(5)-Dy(1)-N(1)#1    | 76.91(13)  | O(1)#1-Dy(1)-N(3)   | 84.86(13)  |
| O(4)-Dy(1)-N(3)      | 137.04(12) | O(2)-Dy(1)-N(3)     | 64.27(12)  |
| O(3)-Dy(1)-N(3)      | 73.35(13)  | O(2)#1-Dy(1)-N(3)   | 122.61(12) |
| O(5)-Dy(1)-N(3)      | 76.65(12)  | N(1)#1-Dy(1)-N(3)   | 148.15(13) |
| O(1)#1-Dy(1)-Dy(1)#1 | 159.79(10) | O(4)-Dy(1)-Dy(1)#1  | 79.37(9)   |
| O(2)-Dy(1)-Dy(1)#1   | 34.35(8)   | O(3)-Dy(1)-Dy(1)#1  | 116.60(9)  |
| O(2)#1-Dy(1)-Dy(1)#1 | 33.96(7)   | O(5)-Dy(1)-Dy(1)#1  | 78.50(8)   |
| N(1)#1-Dy(1)-Dy(1)#1 | 98.04(10)  | N(3)-Dy(1)-Dy(1)#1  | 93.80(9)   |

Symmetry transformations used to generate equivalent atoms: #1 -x,-y+1,-z

**Table S8** The continuous symmetry measurement value calculated by SHAPE 2.0 for complexes **1-10**

| Complex   | $D_{4d}$ SAPR | $D_{2d}$ TDD | $C_{2v}$ JBTPR | $C_{2v}$ BTTPR |
|-----------|---------------|--------------|----------------|----------------|
| <b>1</b>  | 2.668         | <b>1.405</b> | 3.342          | 2.157          |
| <b>2</b>  | 2.643         | <b>1.344</b> | 3.321          | 2.142          |
| <b>3</b>  | 2.598         | <b>1.336</b> | 3.251          | 2.094          |
| <b>4</b>  | 2.593         | <b>1.313</b> | 3.202          | 2.069          |
| <b>5</b>  | 2.631         | <b>1.233</b> | 3.150          | 2.030          |
| <b>6</b>  | 2.515         | <b>1.170</b> | 3.038          | 1.926          |
| <b>7</b>  | <b>2.059</b>  | 2.407        | 3.577          | 2.377          |
| <b>8</b>  | <b>2.006</b>  | 2.320        | 3.428          | 2.270          |
| <b>9</b>  | 3.215         | 2.618        | 3.604          | <b>2.311</b>   |
| <b>10</b> | 2.228         | 2.284        | 2.045          | <b>1.467</b>   |

**Table S9** The datapoints used for the construction of  $\ln\tau$  versus  $1/T$  curves for complexes **9** and **10**.

| Complexes <b>9</b> ( $H_{dc} = 0$ Oe) |         | Complexes <b>10</b> ( $H_{dc} = 0$ Oe) |         |
|---------------------------------------|---------|----------------------------------------|---------|
| $\ln\tau$                             | $1/T$   | $\ln\tau$                              | $1/T$   |
| -8.25044                              | 0.2     | -5.3613                                | 0.25    |
| -8.35306                              | 0.18182 | -5.87036                               | 0.2     |
| -8.44253                              | 0.16667 | -6.13459                               | 0.18182 |
| -8.55049                              | 0.15385 | -6.39157                               | 0.16667 |

|           |         |           |         |
|-----------|---------|-----------|---------|
| -8.68331  | 0.14286 | -6.63566  | 0.15385 |
| -8.76812  | 0.13699 | -6.86345  | 0.14286 |
| -8.85868  | 0.13158 | -7.07122  | 0.13333 |
| -8.95991  | 0.12658 | -7.28336  | 0.125   |
| -9.05817  | 0.12195 | -7.50203  | 0.11765 |
| -9.16403  | 0.11765 | -7.69708  | 0.11111 |
| -9.28743  | 0.11364 | -7.88759  | 0.10526 |
| -9.41403  | 0.10989 | -8.09285  | 0.1     |
| -9.53638  | 0.10638 | -8.30554  | 0.09524 |
| -9.67853  | 0.10309 | -8.5447   | 0.09091 |
| -9.82758  | 0.1     | -8.78945  | 0.08696 |
| -9.98308  | 0.09709 | -9.055    | 0.08333 |
| -10.16732 | 0.09434 | -9.33042  | 0.08    |
| -10.34166 | 0.09174 | -9.62742  | 0.07692 |
| -10.53852 | 0.08929 | -9.94506  | 0.07407 |
| -10.74871 | 0.08696 | -10.24038 | 0.07143 |
|           |         | -10.55663 | 0.06897 |
|           |         | -10.86225 | 0.06667 |

| Complexes 2<br>( $H_{dc} = 3000$ Oe) |         | Complexes 7<br>( $H_{dc} = 1500$ Oe) |         | Complexes 9<br>( $H_{dc} = 2000$ Oe) |         | Complexes 10<br>( $H_{dc} = 1500$ Oe) |         |
|--------------------------------------|---------|--------------------------------------|---------|--------------------------------------|---------|---------------------------------------|---------|
| $\ln\tau$                            | $1/T$   | $\ln\tau$                            | $1/T$   | $\ln\tau$                            | $1/T$   | $\ln\tau$                             | $1/T$   |
| -2.01471                             | 0.5     | -6.82892                             | 0.25    | -6.54848                             | 0.2     | -4.7447                               | 0.25    |
| -5.32629                             | 0.4     | -7.06936                             | 0.22222 | -6.78708                             | 0.18182 | -5.19744                              | 0.22222 |
| -6.77578                             | 0.33333 | -7.36164                             | 0.2     | -7.06108                             | 0.16667 | -5.57268                              | 0.2     |
| -7.72885                             | 0.28571 | -7.70301                             | 0.18182 | -7.35519                             | 0.15385 | -5.94049                              | 0.18182 |
| -8.27913                             | 0.25    | -8.05425                             | 0.16667 | -7.64419                             | 0.14286 | -6.25531                              | 0.16667 |
| -8.66632                             | 0.22222 | -8.4114                              | 0.15385 | -7.94903                             | 0.13333 | -6.5716                               | 0.15385 |
| -8.97707                             | 0.2     | -8.7553                              | 0.14286 | -8.25475                             | 0.125   | -6.85172                              | 0.14286 |
| -9.28991                             | 0.18182 | -9.08482                             | 0.13333 | -8.55624                             | 0.11765 | -7.11727                              | 0.13333 |
| -9.49188                             | 0.16667 | -9.40335                             | 0.125   | -8.86882                             | 0.11111 | -7.37388                              | 0.125   |
| -10.03417                            | 0.15385 | -9.70962                             | 0.11765 | -9.18863                             | 0.10526 | -7.61239                              | 0.11765 |
| -10.54811                            | 0.14286 | -10.01044                            | 0.11111 | -9.51982                             | 0.1     | -7.84974                              | 0.11111 |
|                                      |         | -10.31262                            | 0.10526 | -9.86402                             | 0.09524 | -8.08097                              | 0.10526 |
|                                      |         | -10.62123                            | 0.1     | -10.22097                            | 0.09091 | -8.3125                               | 0.1     |
|                                      |         | -10.94756                            | 0.09524 | -10.5863                             | 0.08696 | -8.55454                              | 0.09524 |
|                                      |         |                                      |         |                                      |         | -8.80868                              | 0.09091 |
|                                      |         |                                      |         |                                      |         | -9.0773                               | 0.08696 |
|                                      |         |                                      |         |                                      |         | -9.36573                              | 0.08333 |
|                                      |         |                                      |         |                                      |         | -9.67829                              | 0.08    |
|                                      |         |                                      |         |                                      |         | -10.0306                              | 0.07692 |
|                                      |         |                                      |         |                                      |         | -10.43863                             | 0.07407 |
|                                      |         |                                      |         |                                      |         | -10.77683                             | 0.07143 |



|  |  |  |  |  |  |           |         |
|--|--|--|--|--|--|-----------|---------|
|  |  |  |  |  |  | -11.11099 | 0.06897 |
|--|--|--|--|--|--|-----------|---------|

1. (a) H. Tian, L. Zhao, Y. N. Guo, Y. Guo, J. Tang and Z. Liu, *Chem. Commun.*, 2012, **48**, 708;  
(b) H. Tian, S. S. Bao and L. M. Zheng, *Chem. Commun.*, 2016, **52**, 2314; (c) H. Tian, Lang. Zhao and J. Tang, *Cryst. Growth Des.*, 2018, 18, 1173.
